# Supplementary material for: Synthesis, X-ray powder diffraction and DFT calculations of vasorelaxant active 3-(arylmethylidene)pyrrolidine-2,5-diones
Source: Royal Society of Chemistry journal article supplement (doi:10.1039/c6ra24302a), 2016-01-01
Supplement: c6ra24302a1.pdf [file c6ra24302a1.pdf]

## Synthesis, X-Ray powder diffraction and DFT calculations of vasorelaxant active 3-(arylmethylidene)pyrrolidine-2,5-diones

ElSayed M. Shalaby,<sup>\*,a,b</sup> Adel S. Girgis,<sup>\*,c</sup> Hanaa Farag,<sup>c</sup> Ahmed F. Mabied<sup>b</sup>  
and Andrew N. Fitch<sup>a</sup>

<sup>a</sup> European Synchrotron Radiation Facility, CS40220, 38043 Grenoble Cedex 9, France

<sup>b</sup> X-Ray Crystallography Lab., Physics Division, National Research Centre, Dokki, Giza 12622, Egypt

<sup>c</sup> Pesticide Chemistry Department, National Research Centre, Dokki, Giza 12622, Egypt

\* Corresponding authors: [sayedshalaby@gmail.com](mailto:sayedshalaby@gmail.com) (ElSayed M. Shalaby),  
[girgisas10@yahoo.com](mailto:girgisas10@yahoo.com) (Adel S. Girgis)

### Supplementary information

#### Table titles

**Table S1.** Selected intramolecular experimental (X-ray) and computationally optimized geometrical parameters (bond lengths, Å) of **12a** and **12b** by AM1, PM3 and DFT methods.

**Table S2.** Selected intramolecular experimental (X-ray) and computationally optimized geometrical parameters (bond angles, °) of **12a** and **12b** by AM1, PM3 and DFT methods.

**Table S3.** Calculated vibrational spectra (IR) of compound **12a**.

**Table S4.** Calculated vibrational spectra (IR) of compound **12b**.

**Table S5.** Theoretical <sup>1</sup>H- and <sup>13</sup>C-NMR chemical shifts (ppm) of compound **12a**.

**Table S6.** Theoretical <sup>1</sup>H- and <sup>13</sup>C-NMR chemical shifts (ppm) of compound **12b**.

#### Figure captions

**Figure S1.** IR spectrum of compound **12a** (KBr pellet).

**Figure S2.** IR spectrum of compound **12b** (KBr pellet).

**Figure S3.** <sup>1</sup>H-NMR spectrum of compound **12a** in CDCl<sub>3</sub>.

**Figure S4.** <sup>1</sup>H-NMR spectrum of compound **12b** in CDCl<sub>3</sub>.

**Figure S5.**  $^1\text{H}$ ,  $^1\text{H}$ -COSY spectrum of compound **12a** in  $\text{CDCl}_3$ .

**Figure S6.**  $^{13}\text{C}$ -NMR spectrum of compound **12a** in  $\text{CDCl}_3$ .

**Figure S7.**  $^{13}\text{C}$ -NMR spectrum of compound **12b** in  $\text{CDCl}_3$ .

**Figure S8.** A projection of the optimized structure of compound **12a** by semi-empirical AM1.

**Figure S9.** A projection of the optimized structure of compound **12a** by semi-empirical PM3.

**Figure S10.** A projection of the optimized structure of compound **12a** by DFT/B3LYP method with 6-31G(d,p) basis set.

**Figure S11.** A projection of the optimized structure of compound **12b** by semi-empirical AM1.

**Figure S12.** A projection of the optimized structure of compound **12b** by semi-empirical PM3.

**Figure S13.** A projection of the optimized structure of compound **12b** by DFT/B3LYP method with 6-31G(d,p) basis set.

**Figure S14.** Molecule Overlay view of the structures of **12a**, red (X-ray structure), green (DFT).

**Figure S15.** MoleculeOverlay view of the structures of **12b**, red (X-ray structure), green (DFT).

**Figure S16.** Simulated IR spectrum of compound **12a** computed by DFT/B3LYP method with 6-31G(d) basis set.

**Figure S17.** Simulated IR spectrum of compound **12b** computed by DFT/B3LYP method with 6-31G(d) basis set.

**Table S1.** Selected intramolecular experimental (X-ray) and computationally optimized geometrical parameters (bond lengths, Å) of **12a** and **12b** by AM1, PM3 and DFT methods.

| Geometric parameters | Compound <b>3a</b> |       |       |       | Compound <b>3b</b> |       |       |       |
|----------------------|--------------------|-------|-------|-------|--------------------|-------|-------|-------|
|                      | Exp. X-ray data    | AM1   | PM3   | DFT   | Exp. X-ray data    | AM1   | PM3   | DFT   |
| N(3)–C(4)            | 1.434              | 1.418 | 1.418 | 1.431 | 1.434              | 1.416 | 1.416 | 1.428 |
| C(4)–C(9)            | 1.371              | 1.414 | 1.414 | 1.399 | 1.371              | 1.415 | 1.415 | 1.400 |
| C(8)–C(9)            | 1.388              | 1.392 | 1.392 | 1.394 | 1.387              | 1.391 | 1.391 | 1.393 |
| C(14)–C(15)          | 1.468              | 1.450 | 1.450 | 1.459 | 1.468              | 1.450 | 1.450 | 1.460 |
| C(17)–C(18)          | 1.372              | 1.400 | 1.400 | 1.395 | 1.373              | 1.396 | 1.396 | 1.396 |
| O(1)–C(2)            | 1.208              | 1.236 | 1.236 | 1.216 | 1.207              | 1.236 | 1.236 | 1.216 |
| N(3)–C(10)           | 1.396              | 1.422 | 1.422 | 1.405 | 1.396              | 1.423 | 1.423 | 1.406 |
| C(5)–C(6)            | 1.378              | 1.392 | 1.392 | 1.394 | 1.378              | 1.391 | 1.391 | 1.393 |
| C(10)–C(12)          | 1.500              | 1.531 | 1.531 | 1.527 | 1.500              | 1.531 | 1.531 | 1.525 |
| C(15)–C(16)          | 1.387              | 1.409 | 1.409 | 1.409 | 1.387              | 1.409 | 1.409 | 1.410 |
| C(18)–C(19)          | 1.382              | 1.397 | 1.397 | 1.396 | 1.382              | 1.393 | 1.393 | 1.397 |
| O(11)–C(10)          | 1.204              | 1.233 | 1.233 | 1.211 | 1.204              | 1.233 | 1.233 | 1.212 |
| C(2)–C(13)           | 1.487              | 1.504 | 1.504 | 1.488 | 1.487              | 1.502 | 1.502 | 1.485 |
| C(6)–C(7)            | 1.360              | 1.392 | 1.392 | 1.395 | 1.360              | 1.396 | 1.396 | 1.393 |
| C(12)–C(13)          | 1.502              | 1.487 | 1.487 | 1.500 | 1.502              | 1.488 | 1.488 | 1.501 |

|                    |       |        |        |        |       |        |        |        |
|--------------------|-------|--------|--------|--------|-------|--------|--------|--------|
| C(15)–C(20)        | 1.400 | 1.401  | 1.401  | 1.410  | 1.400 | 1.401  | 1.401  | 1.410  |
| C(19)–C(20)        | 1.393 | 1.394  | 1.394  | 1.391  | 1.393 | 1.395  | 1.395  | 1.392  |
| N(3)–C(2)          | 1.403 | 1.426  | 1.426  | 1.417  | 1.404 | 1.427  | 1.427  | 1.420  |
| C(4)–C(5)          | 1.368 | 1.415  | 1.415  | 1.399  | 1.368 | 1.415  | 1.415  | 1.400  |
| C(7)–C(8)          | 1.376 | 1.392  | 1.392  | 1.395  | 1.376 | 1.396  | 1.396  | 1.393  |
| C(13)–C(14)        | 1.331 | 1.340  | 1.340  | 1.348  | 1.331 | 1.341  | 1.341  | 1.349  |
| C(16)–C(17)        | 1.375 | 1.390  | 1.390  | 1.390  | 1.374 | 1.391  | 1.391  | 1.391  |
| Cl(21)–C(18)       | 1.758 | 1.697  | 1.697  | 1.754  | ---   | ---    | ---    | ---    |
| Cl(21)–C(7)        | ---   | ---    | ---    | ---    | 1.758 | 1.699  | 1.699  | 1.758  |
| RMSE               | ---   | 0.0236 | 0.0236 | 0.0174 | ---   | 0.0264 | 0.0264 | 0.0171 |
| Maximum difference | ---   | 0.047  | 0.047  | 0.035  | ---   | 0.059  | 0.059  | 0.033  |

---

**Table S2.** Selected intramolecular experimental (X-ray) and computationally optimized geometrical parameters (bond angles, °) of **12a** and **12b** by AM1, PM3 and DFT methods.

| Geometric parameters | Compound <b>3a</b> |       |       |       | Compound <b>3b</b> |       |       |       |
|----------------------|--------------------|-------|-------|-------|--------------------|-------|-------|-------|
|                      | Exp. X-ray data    | AM1   | PM3   | DFT   | Exp. X-ray data    | AM1   | PM3   | DFT   |
| C(2)–N(3)–C(4)       | 124.4              | 125.3 | 125.3 | 123.8 | 124.4              | 125.3 | 125.3 | 123.8 |
| O(1)–C(2)–N(3)       | 124.8              | 126.4 | 126.4 | 125.0 | 124.8              | 126.2 | 126.2 | 124.8 |
| N(3)–C(4)–C(5)       | 119.3              | 121.0 | 121.0 | 119.9 | 119.2              | 121.2 | 121.2 | 120.0 |
| C(4)–C(5)–C(6)       | 119.6              | 120.6 | 120.6 | 119.5 | 119.6              | 120.9 | 120.9 | 120.0 |
| C(7)–C(8)–C(9)       | 120.1              | 121.0 | 121.0 | 120.5 | 120.2              | 120.4 | 120.4 | 119.5 |
| O(11)–C(10)–C(12)    | 127.6              | 123.5 | 123.5 | 126.1 | 127.6              | 123.7 | 123.7 | 126.2 |
| C(2)–C(13)–C(12)     | 107.4              | 107.4 | 107.4 | 108.0 | 107.38             | 107.4 | 107.4 | 108.0 |
| C(13)–C(14)–C(15)    | 130.4              | 129.6 | 129.6 | 130.8 | 130.4              | 129.7 | 129.7 | 130.9 |
| C(16)–C(15)–C(20)    | 117.6              | 118.5 | 118.5 | 117.6 | 117.6              | 118.5 | 118.5 | 117.9 |
| C(18)–C(19)–C(20)    | 120.4              | 119.8 | 119.8 | 119.5 | 120.5              | 120.3 | 120.3 | 120.5 |
| C(2)–N(3)–C(10)      | 112.3              | 109.3 | 109.3 | 112.2 | 112.3              | 109.3 | 109.3 | 112.1 |
| O(1)–C(2)–C(13)      | 128.0              | 124.5 | 124.5 | 127.7 | 128.1              | 124.8 | 124.8 | 128.0 |
| N(3)–C(4)–C(9)       | 119.8              | 121.2 | 121.2 | 119.8 | 119.8              | 121.0 | 121.0 | 120.1 |
| C(5)–C(6)–C(7)       | 120.4              | 121.0 | 121.0 | 120.5 | 120.4              | 120.4 | 120.4 | 119.5 |
| C(4)–C(9)–C(8)       | 119.0              | 120.6 | 120.6 | 119.5 | 118.9              | 120.9 | 120.9 | 120.0 |
| N(3)–C(10)–C(12)     | 108.5              | 109.6 | 109.6 | 108.0 | 108.5              | 109.6 | 109.6 | 108.0 |

|                    |       |       |       |       |        |       |       |       |
|--------------------|-------|-------|-------|-------|--------|-------|-------|-------|
| C(2)–C(13)–C(14)   | 119.9 | 120.7 | 120.7 | 119.1 | 119.9  | 120.7 | 120.7 | 119.2 |
| C(14)–C(15)–C(16)  | 118.2 | 117.5 | 117.5 | 117.7 | 118.2  | 117.4 | 117.4 | 117.5 |
| C(15)–C(16)–C(17)  | 122.0 | 121.0 | 121.0 | 121.8 | 122    | 120.7 | 120.7 | 121.3 |
| C(15)–C(20)–C(19)  | 120.2 | 120.9 | 120.9 | 121.2 | 120.3  | 120.6 | 120.6 | 120.7 |
| C(4)–N(3)–C(10)    | 123.3 | 125.4 | 125.4 | 123.9 | 123.3  | 125.4 | 125.4 | 124.0 |
| N(3)–C(2)–C(13)    | 107.2 | 109.1 | 109.1 | 107.3 | 107.2  | 109.1 | 109.1 | 107.3 |
| C(5)–C(4)–C(9)     | 120.9 | 117.9 | 117.9 | 120.3 | 120.9  | 117.8 | 117.8 | 119.9 |
| C(6)–C(7)–C(8)     | 120.0 | 119.0 | 119.0 | 119.6 | 120    | 119.6 | 119.6 | 120.9 |
| O(11)–C(10)–N(3)   | 123.9 | 126.9 | 126.9 | 125.9 | 123.9  | 126.7 | 126.7 | 125.8 |
| C(10)–C(12)–C(13)  | 104.6 | 104.6 | 104.6 | 104.5 | 104.6  | 104.6 | 104.6 | 104.5 |
| C(12)–C(13)–C(14)  | 132.7 | 132.0 | 132.0 | 132.9 | 132.74 | 131.9 | 131.9 | 132.8 |
| C(14)–C(15)–C(20)  | 124.2 | 124.0 | 124.0 | 124.6 | 124.2  | 124.0 | 124.0 | 124.5 |
| C(16)–C(17)–C(18)  | 120.1 | 119.6 | 119.6 | 119.0 | 120.1  | 120.1 | 120.1 | 119.9 |
| C(17)–C(18)–C(19)  | 119.6 | 120.2 | 120.2 | 120.9 | 119.5  | 119.7 | 119.7 | 119.7 |
| Cl(21)–C(18)–C(17) | 120.2 | 119.8 | 119.8 | 119.6 | ---    | ---   | ---   | ---   |
| Cl(21)–C(18)–C(19) | 120.2 | 119.9 | 119.9 | 119.5 | ---    | ---   | ---   | ---   |
| Cl(21)–C(7)–C(8)   | ---   | ---   | ---   | ---   | 120.2  | 120.2 | 120.2 | 119.5 |
| Cl(21)–C(7)–C(6)   | ---   | ---   | ---   | ---   | 119.8  | 120.2 | 120.2 | 119.5 |
| RMSE               | ---   | 1.632 | 1.632 | 0.705 | ---    | 1.593 | 1.593 | 0.686 |
| Maximum difference | ---   | 4.1   | 4.1   | 2.0   | ---    | 3.9   | 3.9   | 1.9   |

**Table S3.** Calculated vibrational spectra (IR) of compound **12a**.

| Scaled freq. (cm <sup>-1</sup> ) | Intensity | Scaled freq. (cm <sup>-1</sup> ) | Intensity | Scaled freq. (cm <sup>-1</sup> ) | Intensity |
|----------------------------------|-----------|----------------------------------|-----------|----------------------------------|-----------|
| 19                               | 0.001     | 688                              | 1.011     | 1243                             | 2.134     |
| 31                               | 0.028     | 711                              | 0.112     | 1284                             | 0.831     |
| 51                               | 0.010     | 730                              | 3.889     | 1291                             | 4.515     |
| 53                               | 0.110     | 749                              | 3.666     | 1298                             | 0.346     |
| 67                               | 0.261     | 798                              | 1.541     | 1316                             | 0.488     |
| 102                              | 0.314     | 804                              | 5.966     | 1336                             | 100.000   |
| 121                              | 1.100     | 807                              | 5.571     | 1363                             | 0.059     |
| 152                              | 0.133     | 809                              | 0.015     | 1399                             | 2.330     |
| 176                              | 0.006     | 882                              | 0.675     | 1420                             | 1.159     |
| 186                              | 0.251     | 887                              | 4.354     | 1444                             | 0.797     |
| 208                              | 0.061     | 919                              | 0.073     | 1478                             | 14.452    |
| 268                              | 0.132     | 920                              | 0.551     | 1486                             | 11.873    |
| 289                              | 1.294     | 925                              | 0.071     | 1548                             | 0.562     |
| 308                              | 0.020     | 936                              | 0.617     | 1581                             | 2.062     |
| 322                              | 0.105     | 951                              | 0.386     | 1582                             | 11.183    |
| 376                              | 0.031     | 952                              | 0.556     | 1593                             | 2.698     |
| 398                              | 0.003     | 953                              | 0.680     | 1641                             | 23.580    |
| 401                              | 0.025     | 980                              | 0.199     | 1725                             | 67.240    |
| 407                              | 7.034     | 987                              | 5.550     | 1779                             | 23.752    |
| 427                              | 0.022     | 1018                             | 0.237     | 2930                             | 0.665     |
| 479                              | 0.210     | 1064                             | 7.142     | 2962                             | 0.405     |
| 498                              | 0.650     | 1070                             | 13.999    | 3039                             | 0.101     |
| 512                              | 2.941     | 1093                             | 2.838     | 3059                             | 0.002     |
| 568                              | 1.414     | 1105                             | 3.128     | 3067                             | 0.894     |
| 572                              | 0.329     | 1136                             | 0.338     | 3070                             | 2.887     |
| 602                              | 3.848     | 1146                             | 10.957    | 3081                             | 6.004     |
| 607                              | 0.270     | 1148                             | 35.542    | 3092                             | 0.419     |
| 619                              | 1.092     | 1156                             | 7.753     | 3097                             | 0.736     |
| 644                              | 2.994     | 1171                             | 1.005     | 3115                             | 0.336     |
| 672                              | 2.338     | 1172                             | 0.444     | 3115                             | 0.174     |
| 681                              | 4.189     | 1203                             | 2.545     | 3116                             | 0.584     |

**Table S4.** Calculated vibrational spectra (IR) of compound **12b**.

| Scaled freq. (cm <sup>-1</sup> ) | Intensity | Scaled freq. (cm <sup>-1</sup> ) | Intensity | Scaled freq. (cm <sup>-1</sup> ) | Intensity |
|----------------------------------|-----------|----------------------------------|-----------|----------------------------------|-----------|
| 19                               | 0.009     | 704                              | 2.454     | 1245                             | 2.107     |
| 29                               | 0.032     | 705                              | 0.781     | 1284                             | 0.150     |
| 45                               | 0.024     | 737                              | 2.310     | 1292                             | 1.397     |
| 53                               | 0.107     | 751                              | 5.328     | 1295                             | 4.339     |
| 83                               | 0.005     | 792                              | 0.046     | 1319                             | 0.122     |
| 99                               | 0.213     | 801                              | 2.503     | 1336                             | 100.000   |
| 124                              | 1.006     | 804                              | 6.455     | 1369                             | 0.308     |
| 136                              | 0.340     | 817                              | 0.001     | 1396                             | 0.656     |
| 170                              | 0.071     | 886                              | 8.581     | 1420                             | 0.789     |
| 194                              | 0.223     | 888                              | 0.295     | 1437                             | 2.470     |
| 245                              | 0.173     | 914                              | 0.307     | 1480                             | 34.938    |
| 253                              | 0.142     | 918                              | 0.068     | 1484                             | 0.427     |
| 269                              | 0.134     | 926                              | 0.294     | 1566                             | 0.832     |
| 281                              | 0.475     | 937                              | 0.707     | 1566                             | 0.074     |
| 337                              | 0.054     | 950                              | 0.542     | 1585                             | 0.012     |
| 383                              | 0.055     | 953                              | 1.056     | 1592                             | 2.430     |
| 396                              | 0.010     | 964                              | 0.158     | 1639                             | 30.475    |
| 403                              | 0.006     | 975                              | 0.223     | 1724                             | 64.989    |
| 416                              | 2.951     | 993                              | 4.874     | 1777                             | 21.160    |
| 416                              | 5.116     | 1017                             | 0.208     | 2930                             | 0.656     |
| 498                              | 1.075     | 1068                             | 13.311    | 2963                             | 0.380     |
| 509                              | 1.294     | 1072                             | 2.269     | 3038                             | 0.108     |
| 511                              | 2.096     | 1083                             | 6.298     | 3057                             | 0.540     |
| 557                              | 3.492     | 1108                             | 2.311     | 3064                             | 0.049     |
| 571                              | 0.498     | 1136                             | 0.428     | 3073                             | 3.528     |
| 578                              | 4.455     | 1145                             | 44.228    | 3084                             | 5.143     |
| 607                              | 0.301     | 1148                             | 1.672     | 3094                             | 0.651     |
| 619                              | 0.016     | 1158                             | 7.593     | 3094                             | 0.372     |
| 632                              | 1.774     | 1171                             | 2.085     | 3112                             | 0.977     |
| 675                              | 4.600     | 1173                             | 0.177     | 3123                             | 0.060     |
| 679                              | 0.122     | 1203                             | 2.045     | 3124                             | 0.060     |



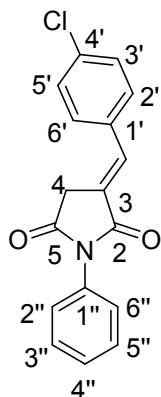

**Table S5.** Theoretical  $^1\text{H}$ - and  $^{13}\text{C}$ -NMR chemical shifts (ppm) of compound **12a**.

| Atom                   | Calculated (ppm) DFT/B3LYP and 6-31G(d) level of theory |
|------------------------|---------------------------------------------------------|
| $\text{H}_2\text{C-4}$ | 3.28, 3.33 (mean = 3.31)                                |
| H-3'                   | 7.29                                                    |
| H-5'                   | 7.30                                                    |
| H-4''                  | 7.33                                                    |
| H-2'                   | 7.36                                                    |
| H-3''                  | 7.43                                                    |
| H-5''                  | 7.44                                                    |
| H-6'                   | 7.44                                                    |
| Olefinic CH            | 7.46                                                    |
| H-2''                  | 7.68                                                    |
| H-6''                  | 7.70                                                    |
| $\text{H}_2\text{C-4}$ | 34.1                                                    |
| C-6''                  | 126.1                                                   |
| C-2''                  | 126.2                                                   |
| C-3                    | 126.5                                                   |
| C-4''                  | 127.3                                                   |
| C-3''                  | 128.5                                                   |
| C-5''                  | 128.6                                                   |
| C-6'                   | 129.6                                                   |
| C-5'                   | 130.3                                                   |
| C-3'                   | 130.5                                                   |
| C-1'                   | 134.3                                                   |
| C-1''                  | 135.2                                                   |
| Olefinic CH            | 136.8                                                   |
| C-2'                   | 137.4                                                   |
| C-4'                   | 147.8                                                   |
| CO-2                   | 171.4                                                   |
| CO-5                   | 173.1                                                   |

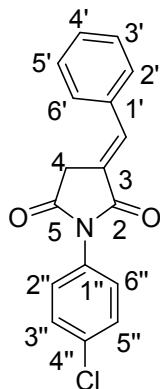

**Table S6.** Theoretical  $^1\text{H}$ - and  $^{13}\text{C}$ -NMR chemical shifts (ppm) of compound **12b**.

| Atom                    | Calculated (ppm) DFT/B3LYP and 6-31G(d) level of theory |
|-------------------------|---------------------------------------------------------|
| $\text{H}_2\text{C}$ -4 | 3.34, 3.39 (mean = 3.37)                                |
| HC-3''                  | 7.24                                                    |
| HC-5''                  | 7.25                                                    |
| HC-4'                   | 7.45                                                    |
| HC-2'                   | 7.47                                                    |
| HC-3'                   | 7.50                                                    |
| HC-5'                   | 7.50                                                    |
| HC-6'                   | 7.54                                                    |
| Olefinic-CH             | 7.57                                                    |
| HC-2''                  | 7.72                                                    |
| HC-6''                  | 7.74                                                    |
| $\text{H}_2\text{C}$ -4 | 34.4                                                    |
| C-3                     | 124.8                                                   |
| C-2''                   | 126.9                                                   |
| C-6''                   | 126.9                                                   |
| C-6'                    | 129.0                                                   |
| C-3''                   | 129.3                                                   |
| C-5'                    | 129.4                                                   |
| C-5''                   | 129.4                                                   |
| C-3'                    | 129.7                                                   |
| C-4'                    | 131.2                                                   |
| C-1''                   | 133.9                                                   |
| C-1'                    | 135.6                                                   |
| C-2'                    | 137.1                                                   |
| Olefinic-CH             | 139.4                                                   |
| C-4''                   | 143.2                                                   |
| CO-2                    | 171.5                                                   |
| CO-5                    | 173.5                                                   |

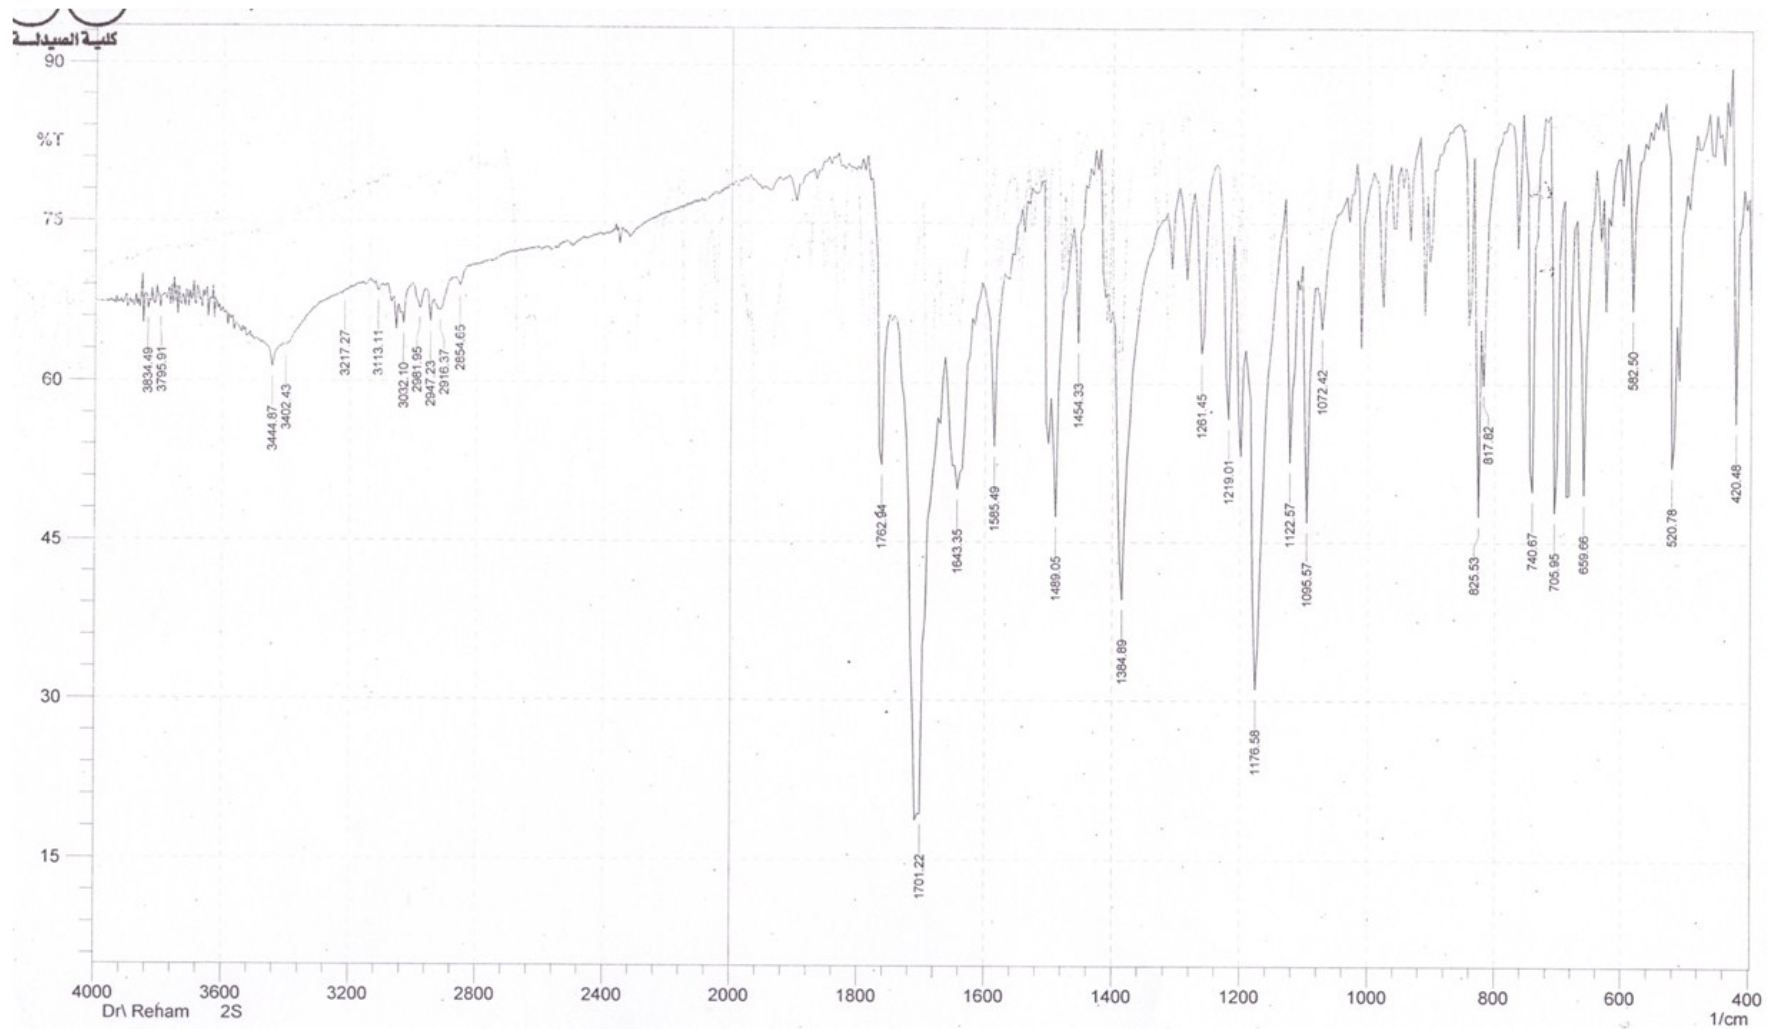

Figure S1. IR spectrum of compound 12a (KBr pellet).

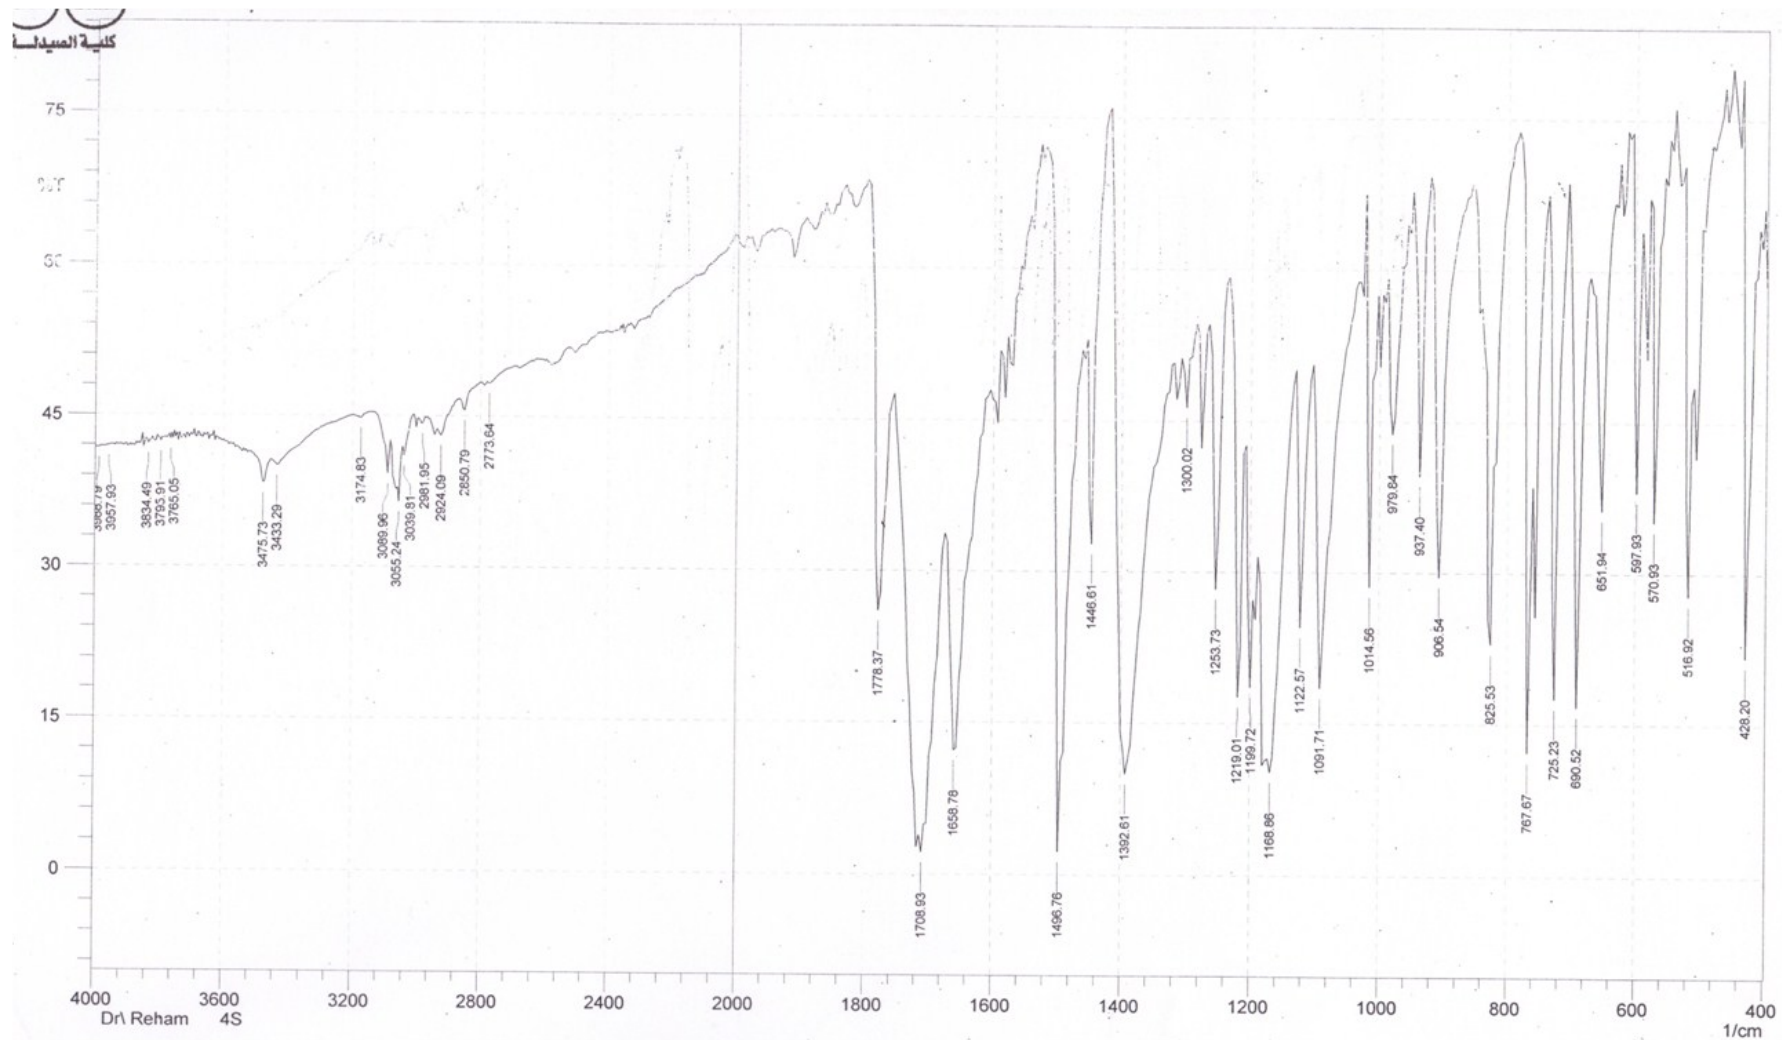

**Figure S2.** IR spectrum of compound **12b** (KBr pellet).

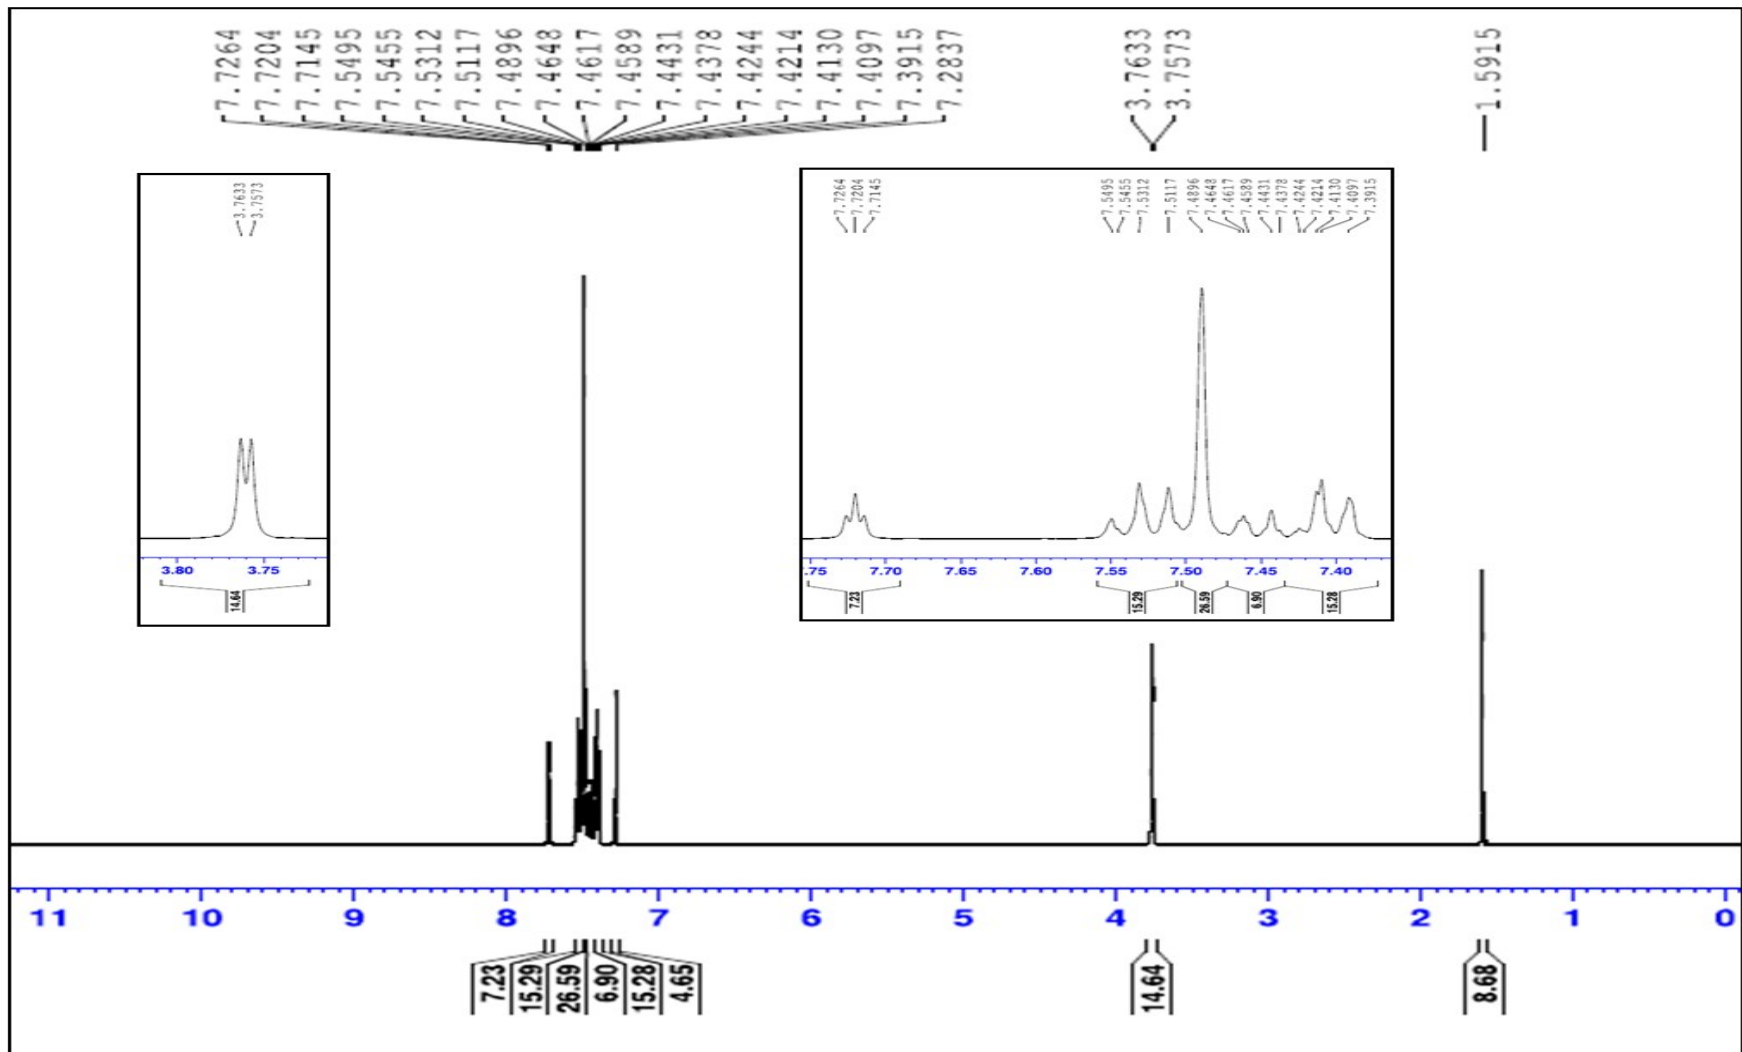

Figure S3. <sup>1</sup>H-NMR spectrum of compound **12a** in CDCl<sub>3</sub>.

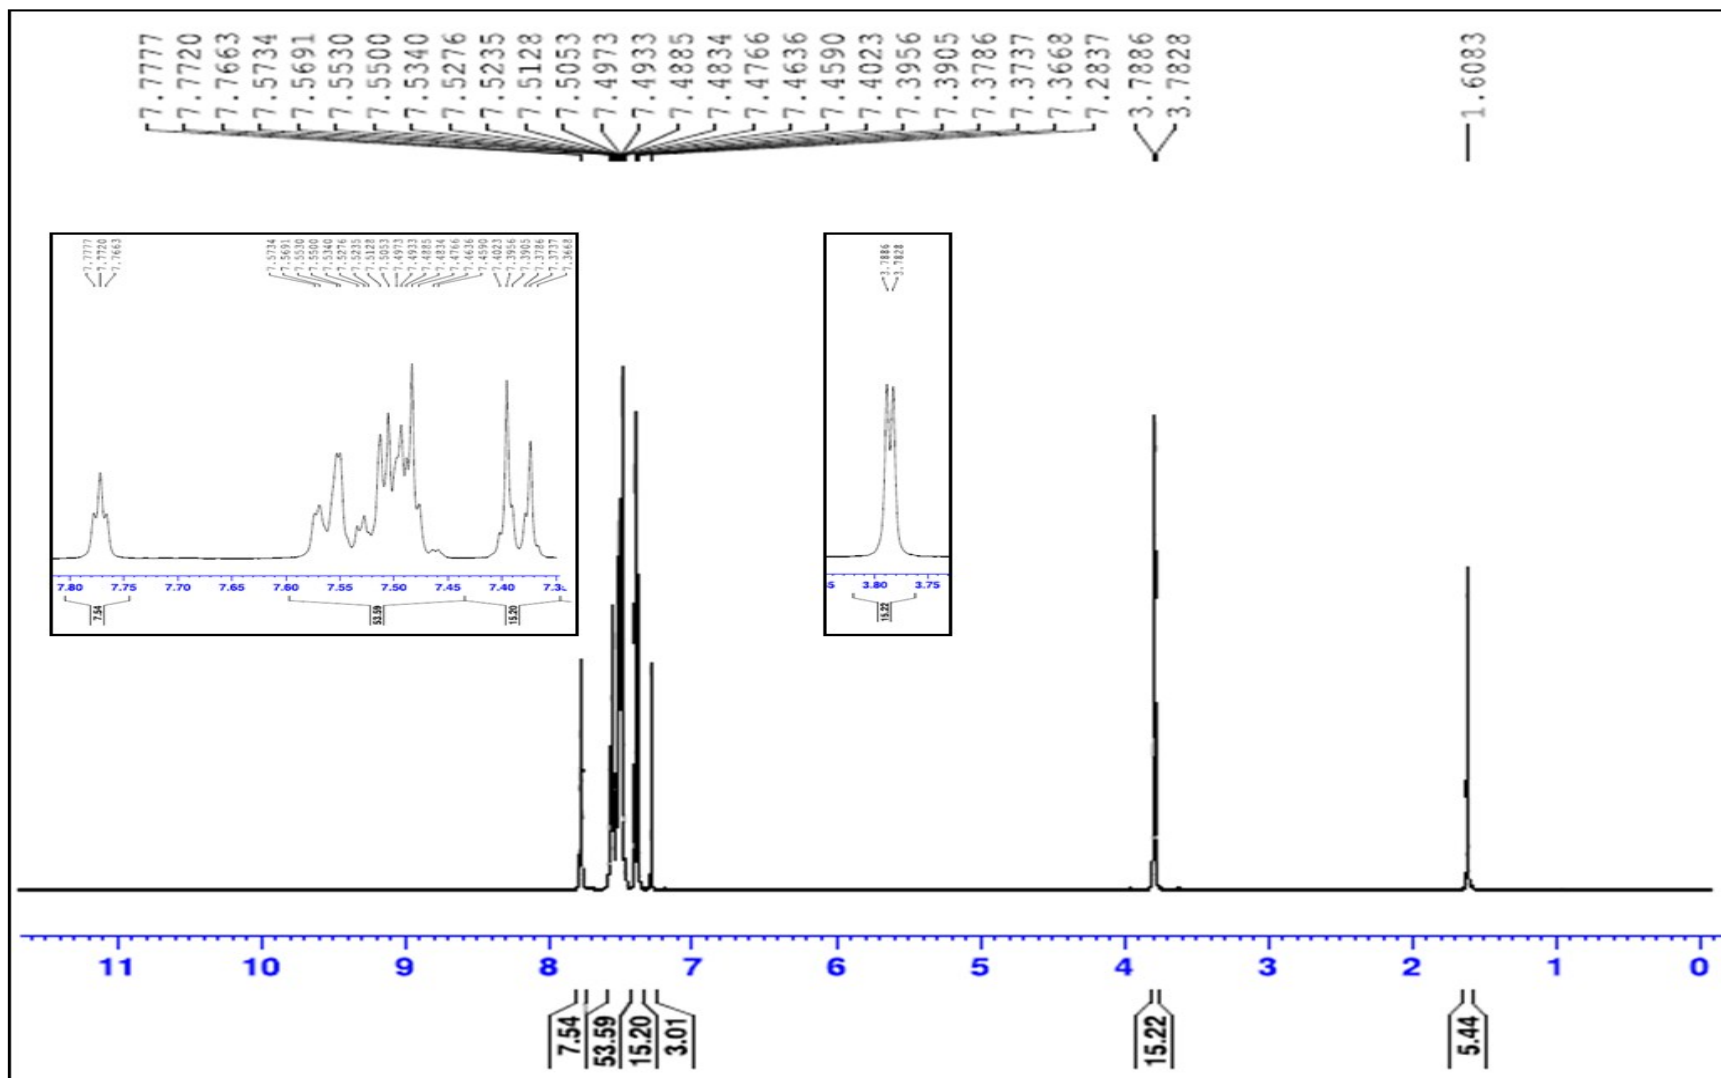

Figure S4. <sup>1</sup>H-NMR spectrum of compound **12b** in CDCl<sub>3</sub>.

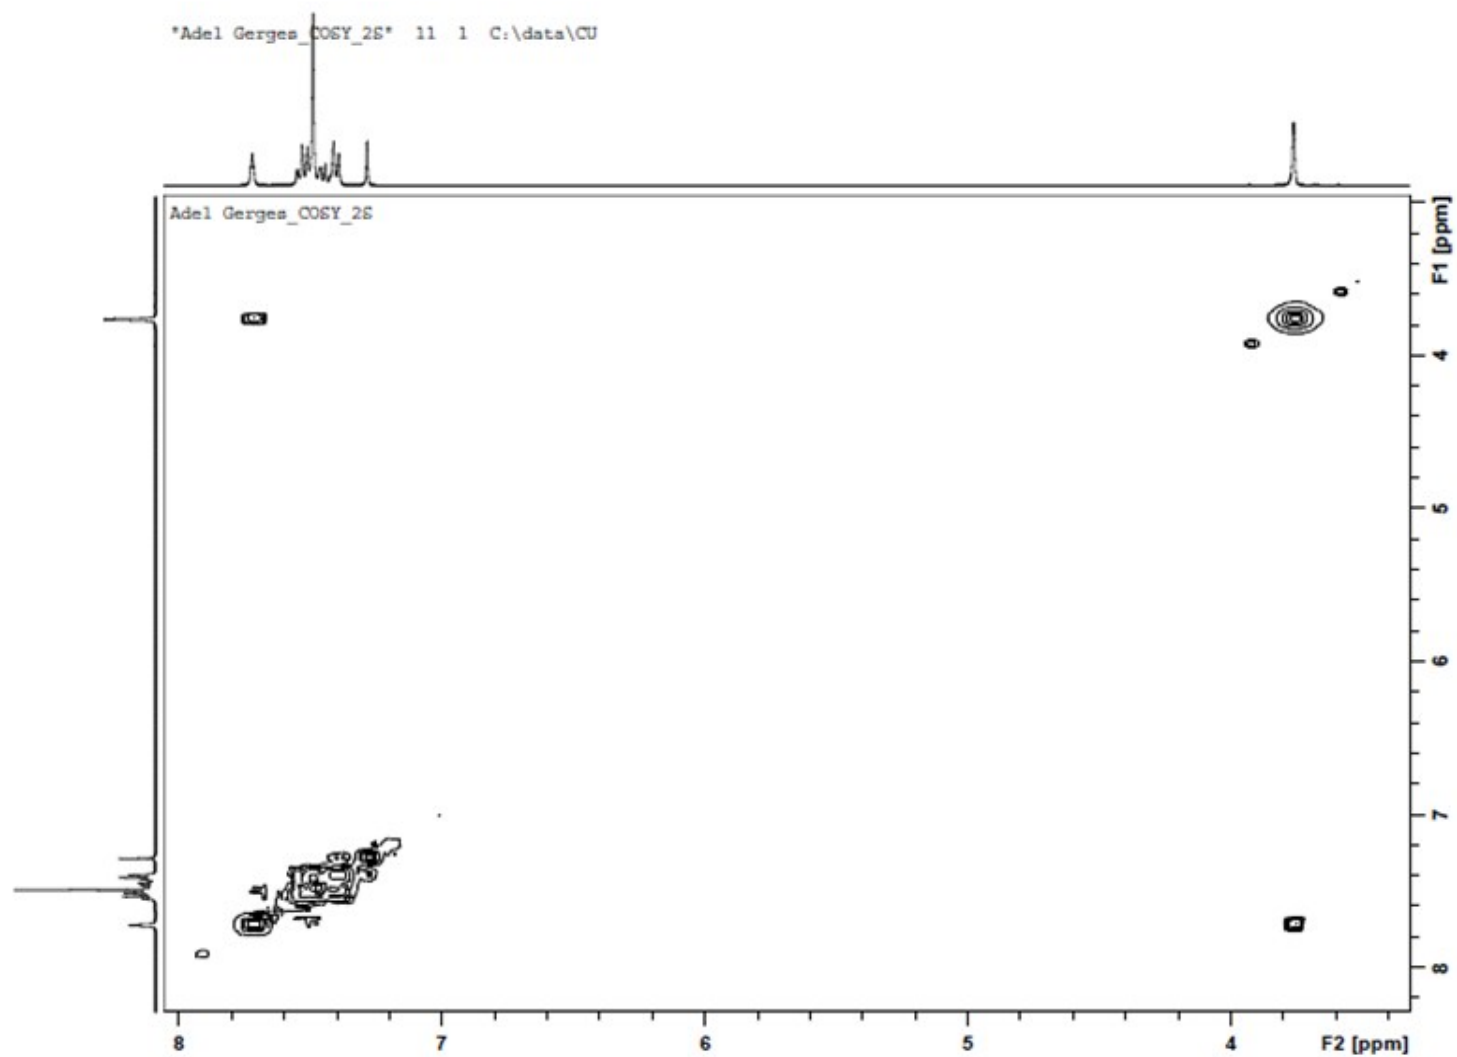

**Figure S5.**  $^1\text{H}$ ,  $^1\text{H}$ -COSY spectrum of compound **12a** in  $\text{CDCl}_3$ .

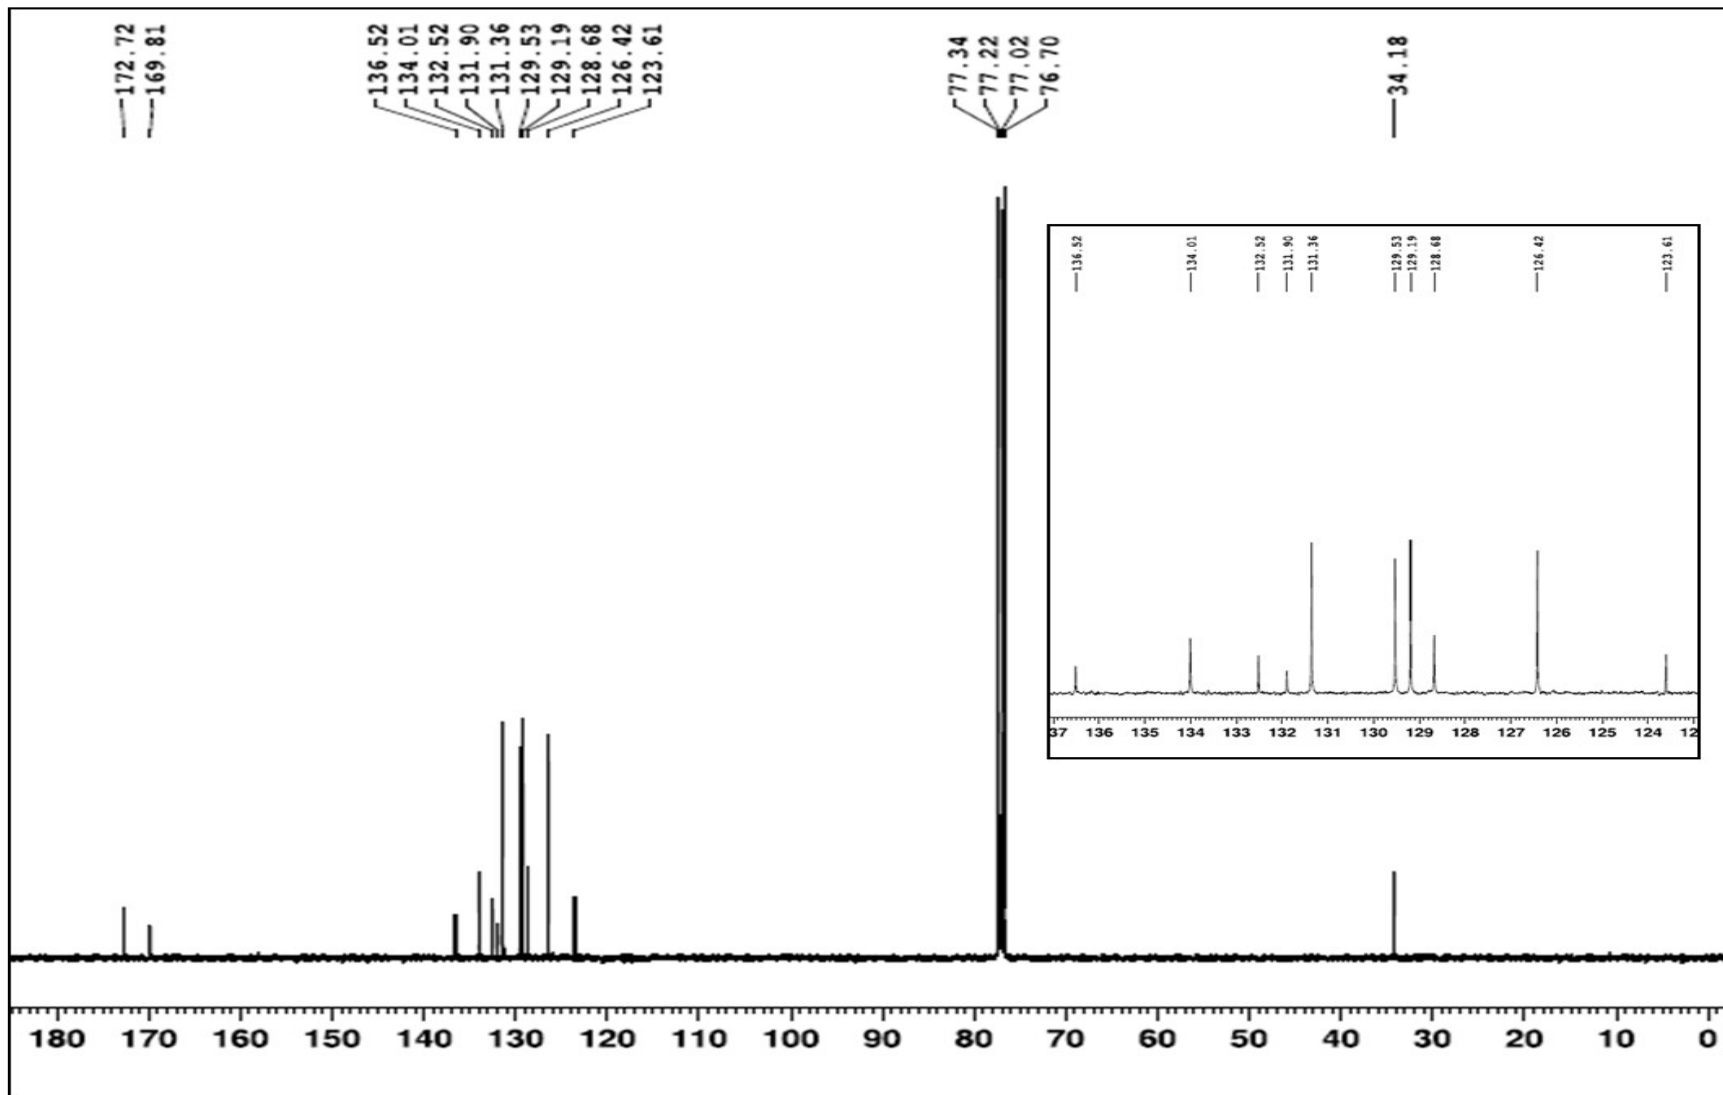

Figure S6.  $^{13}\text{C}$ -NMR spectrum of compound **12a** in  $\text{CDCl}_3$ .



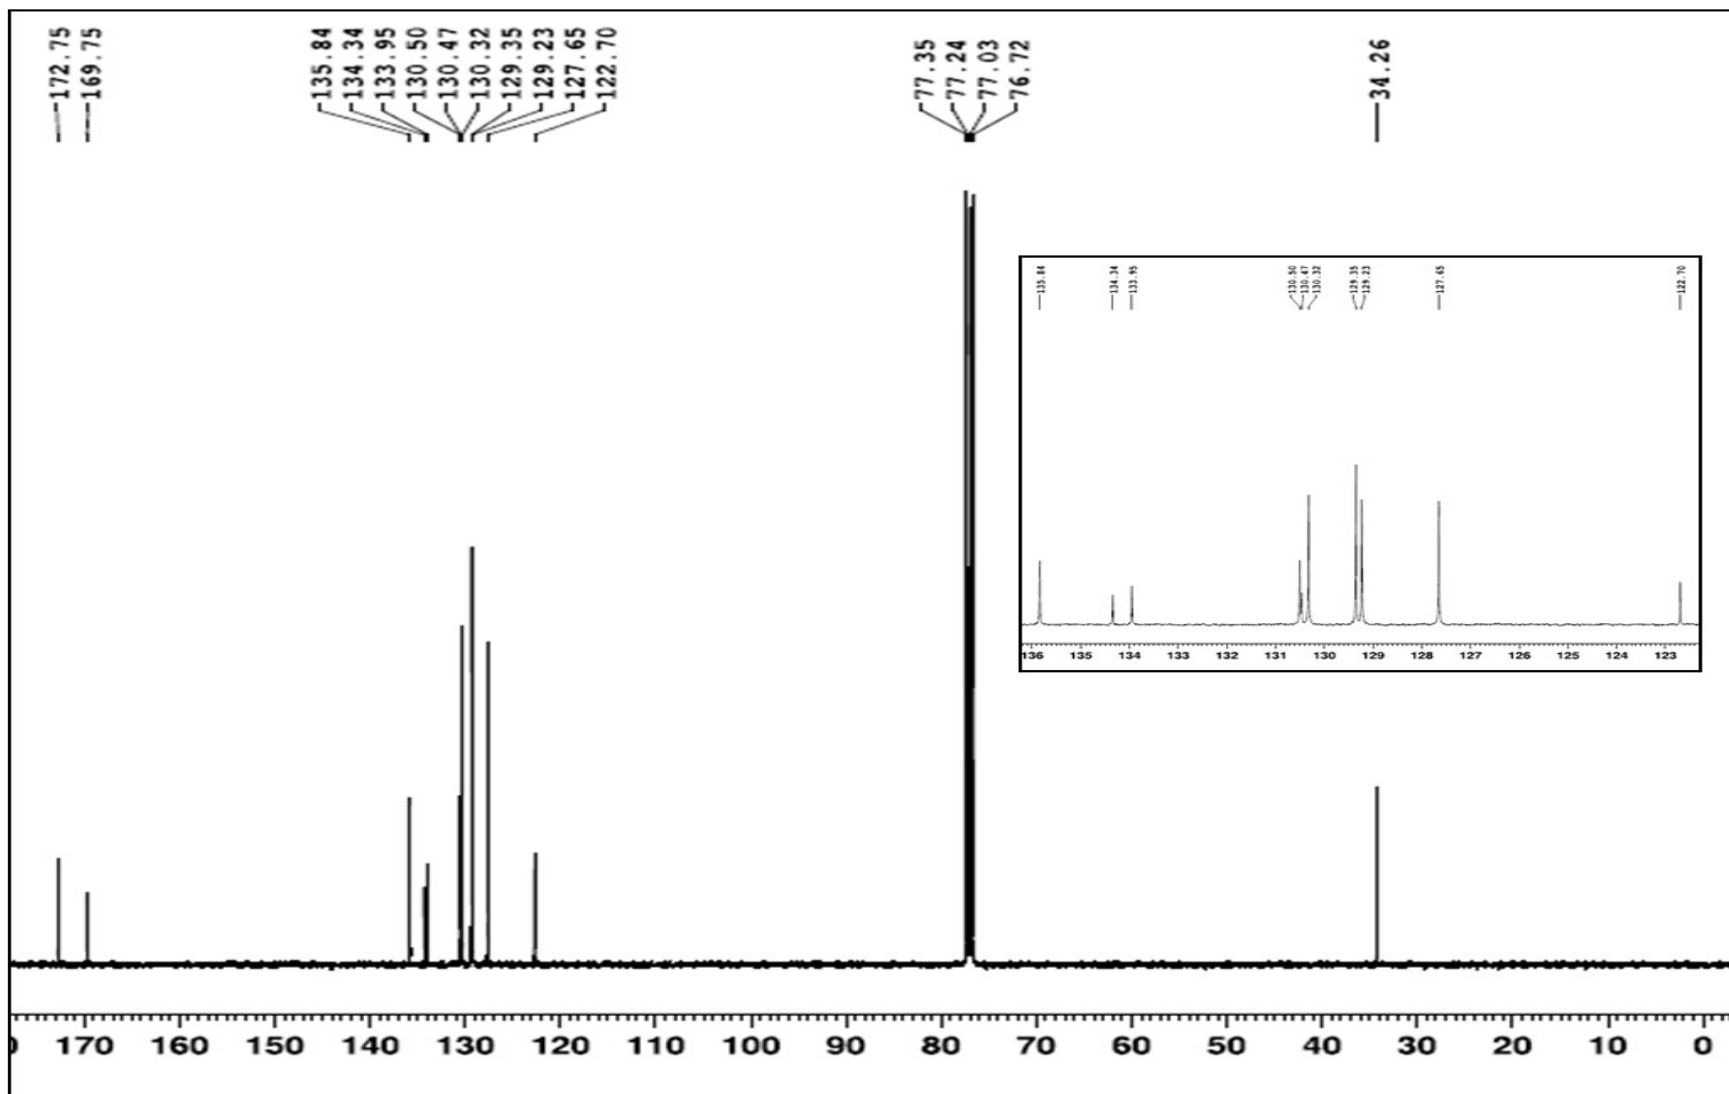

Figure S7.  $^{13}\text{C}$ -NMR spectrum of compound **12b** in  $\text{CDCl}_3$ .

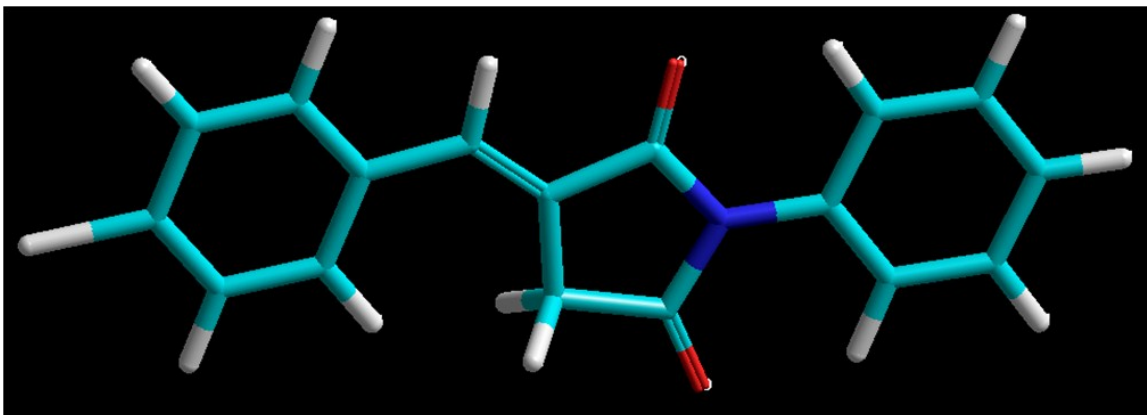

**Figure S8.** A projection of the optimized structure of compound **12a** by semi-empirical AM1.

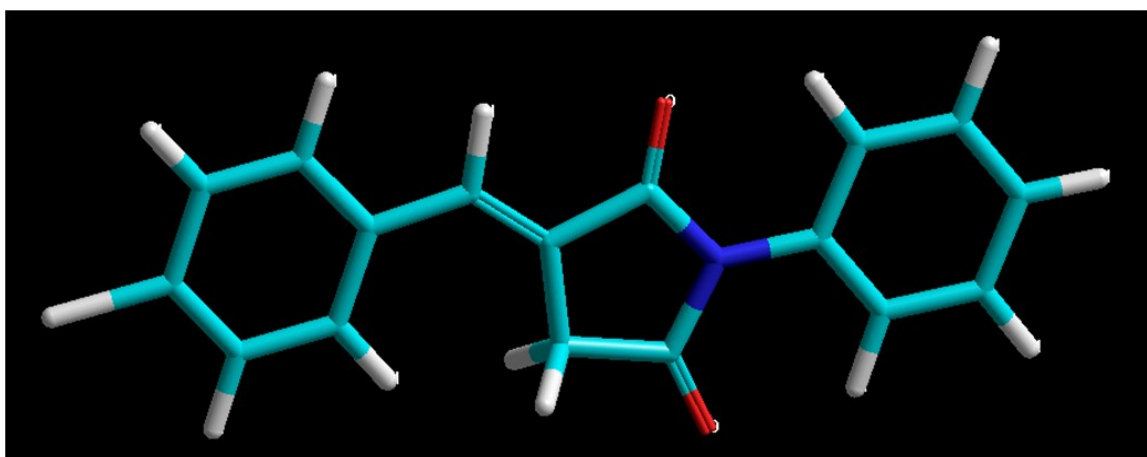

**Figure S9.** A projection of the optimized structure of compound **12a** by semi-empirical PM3.

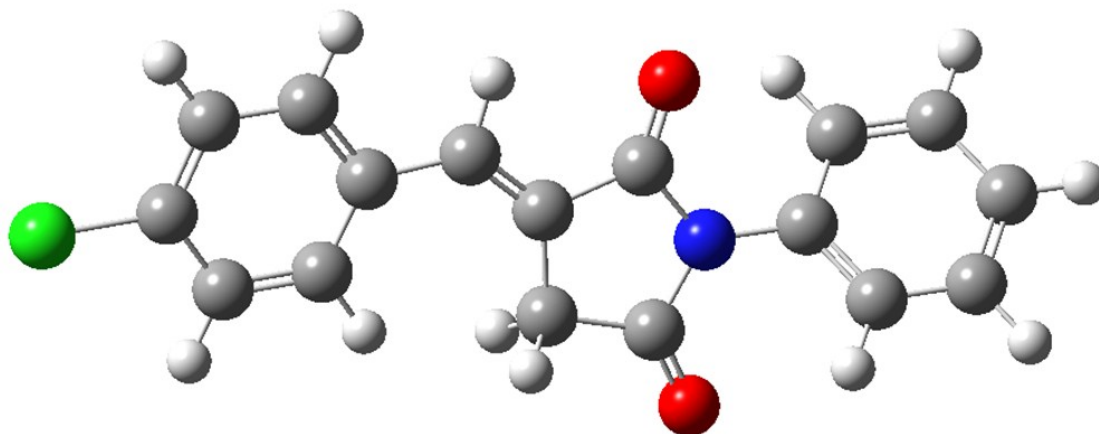

**Figure S10.** A projection of the optimized structure of compound **12a** by DFT/B3LYP method with 6-31G(d,p) basis set.

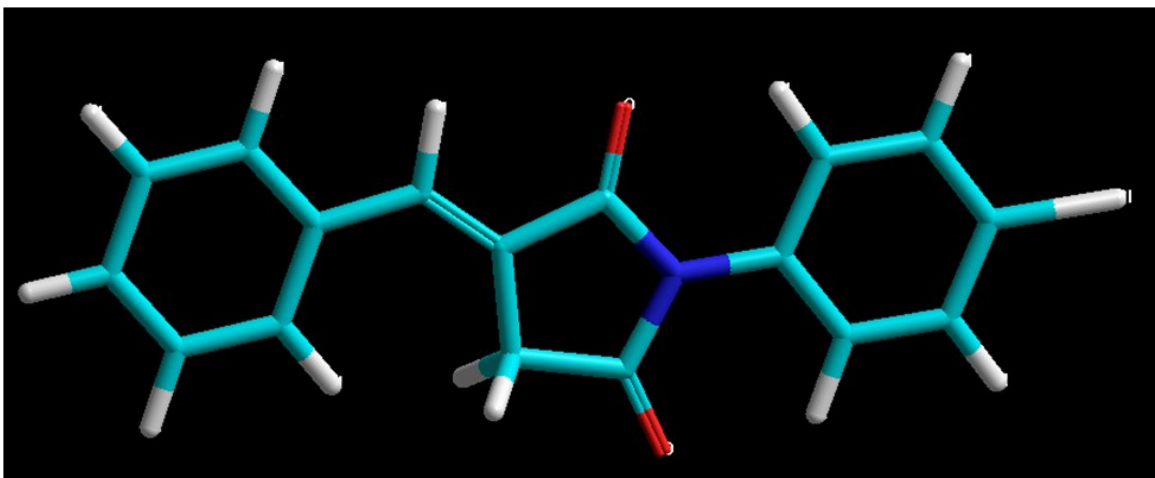

**Figure S11.** A projection of the optimized structure of compound **12b** by semi-empirical AM1.

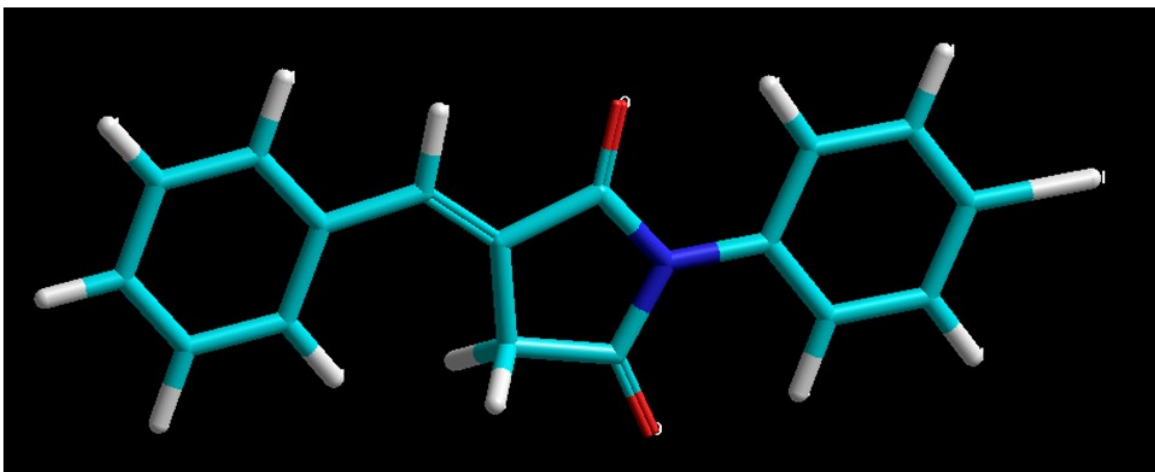

**Figure S12.** A projection of the optimized structure of compound **12b** by semi-empirical PM3.

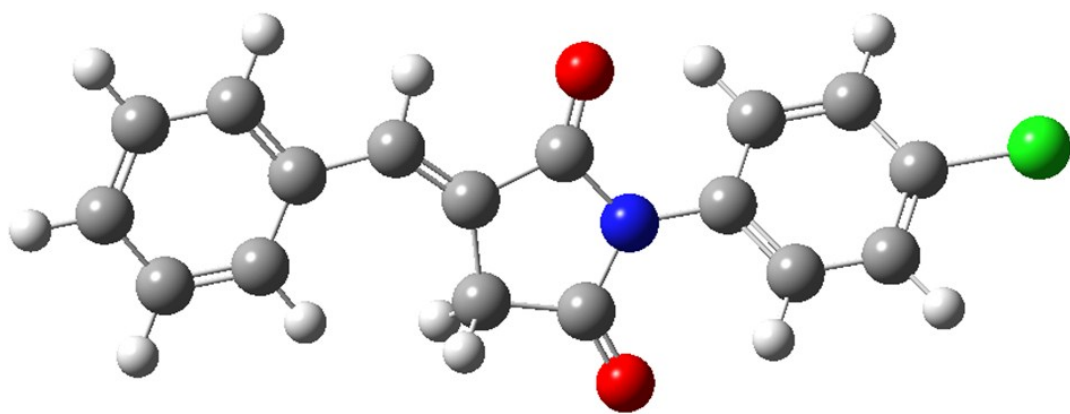

**Figure S13.** A projection of the optimized structure of compound **12b** by DFT/B3LYP method with 6-31G(d,p) basis set.

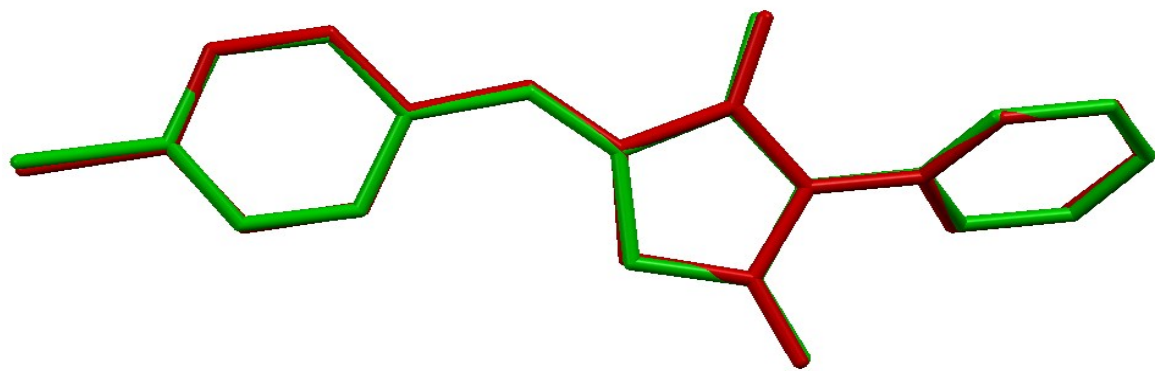

**Figure S14.** Molecule Overlay view of the structures of **12a**, red (X-ray structure), green (DFT).

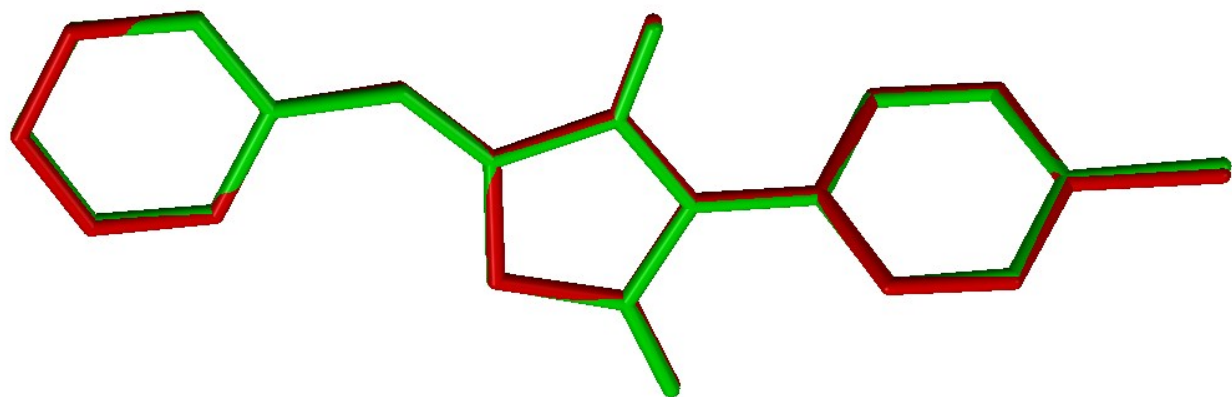

**Figure S15.** MoleculeOverlay view of the structures of **12b**, red (X-ray structure), green (DFT).

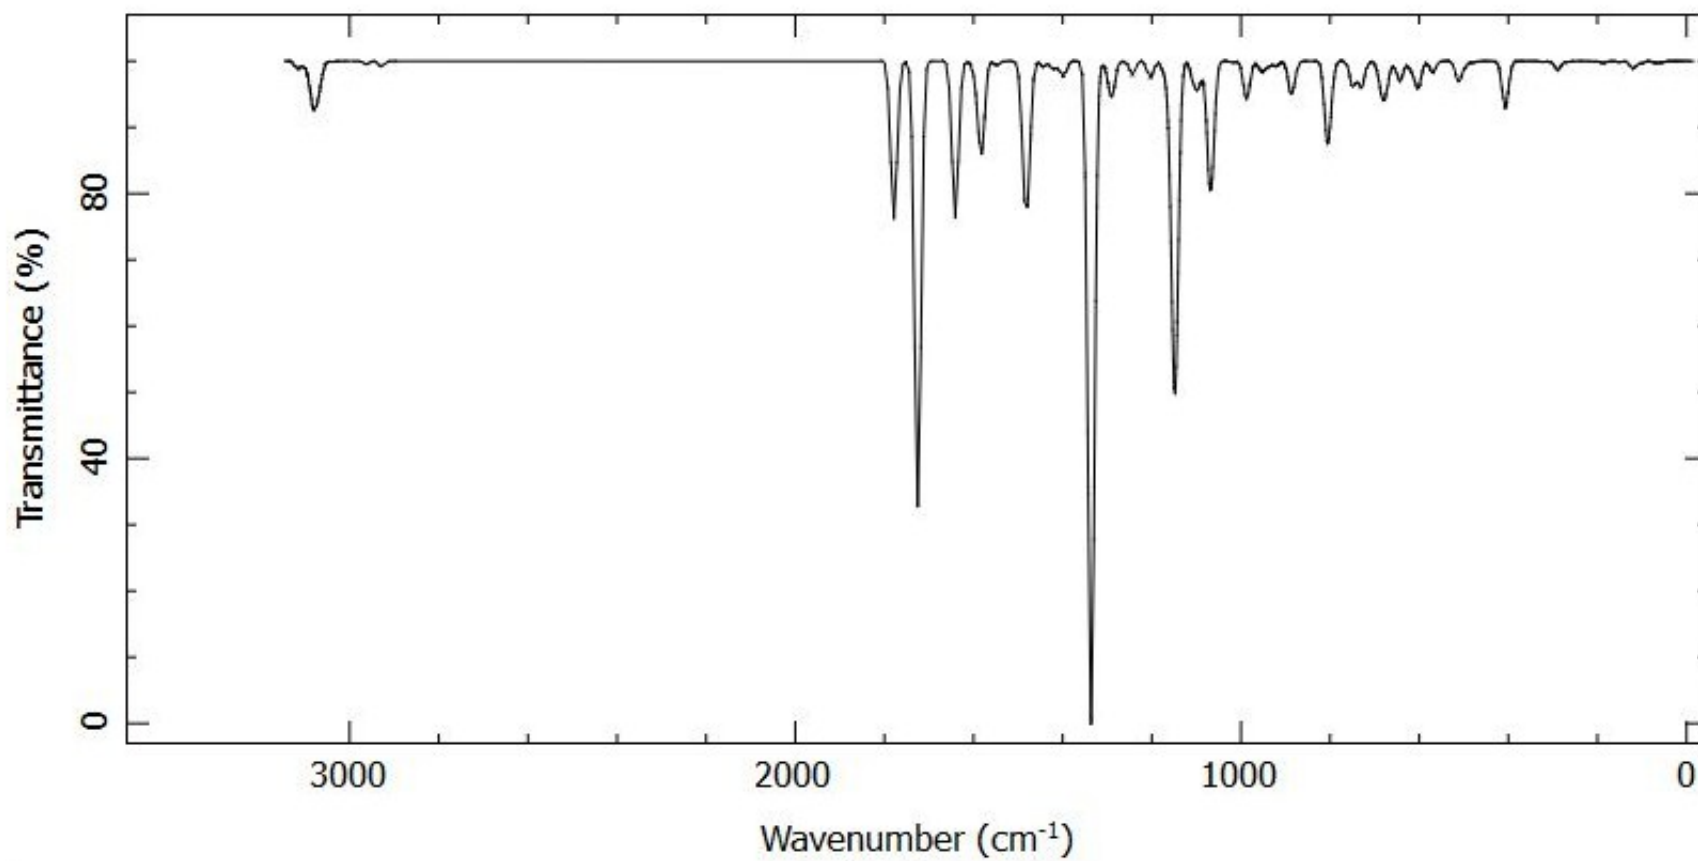

**Figure S16.** Simulated IR spectrum of compound **12a** computed by DFT/B3LYP method with 6-31G(d) basis set.

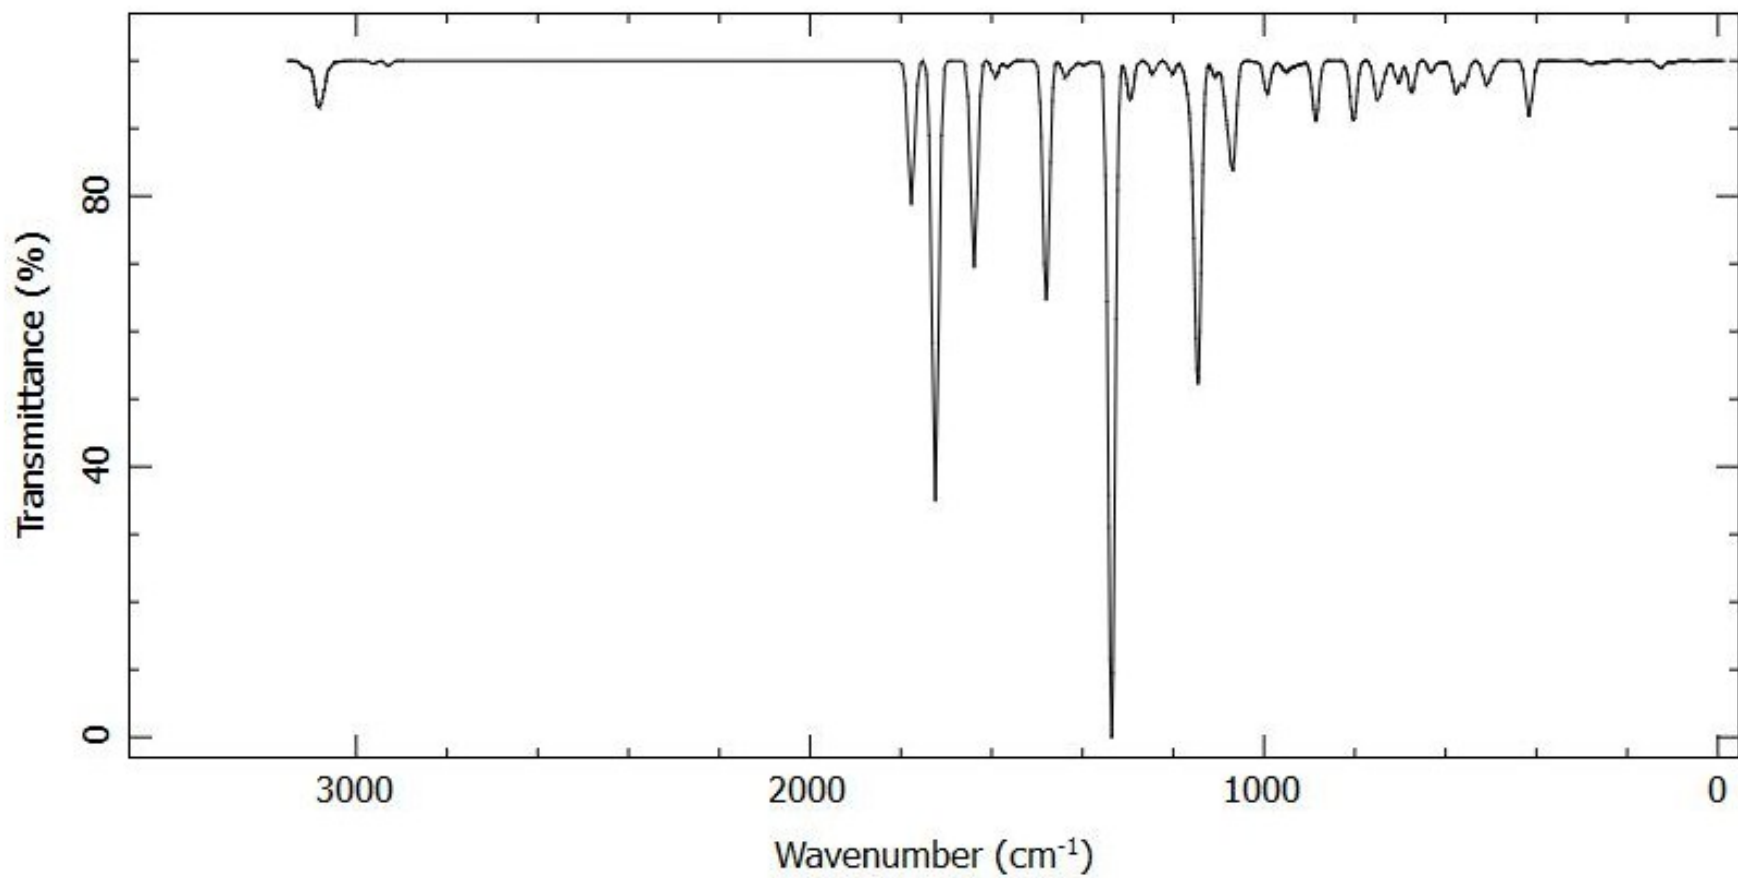

**Figure S17.** Simulated IR spectrum of compound **12b** computed by DFT/B3LYP method with 6-31G(d) basis set.
